# Supplementary material
Source: PubMed Central journal article supplement (PMC4376604)
Supplement: NIHMS663553-supplement-1.pdf [file NIHMS663553-supplement-1.pdf]

## Inventory of Supplemental Information

Supplemental Information includes four supplemental figures—S1 to S4—and Supplemental Experimental Procedures.

Figure S1 – related to Figure 2. Shows the RNA-seq read alignments to identify the multiple *Xirp2* isoforms in cochlear and utricular hair cells.

Figure S2 – related to Figure 3. Shows the normal mechanotransduction function of *Xirp2*<sup>-/-</sup> hair cells.

Figure S3 – related to Figure 3. Shows the delayed kinocilia degeneration in *Xirp2*<sup>-/-</sup> cochlea.

Figure S4 – related to Figure 3. Shows the membrane protrusions at the cells surface of *Xirp2*<sup>-/-</sup> hair cells.
